# Supplementary figures and images for: Expressed Alu repeats as a novel, reliable tool for normalization of real-time quantitative RT-PCR data
Source: Springer Nature journal article supplement (doi:10.1186/gb-2010-11-1-r9), 2010-01-28

A selection of RNA from peripheral blood

---

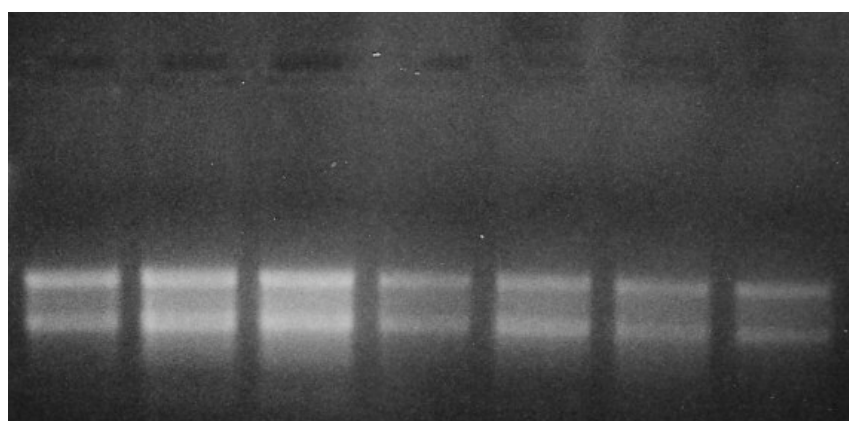

28S rRNA  
18S rRNA

Supplement: Additional file 2 [file gb-2010-11-1-r9-s2.pdf]
